# Supplementary material for: Proteome Dynamics in iPSC-Derived Human Dopaminergic Neurons
Source: PubMed Central journal article supplement (PMC11474371; doi:10.1016/j.mcpro.2024.100838), 2024-09-07

A)

## Ribosome

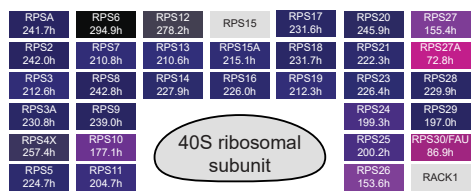

## Mitochondrial ribosome

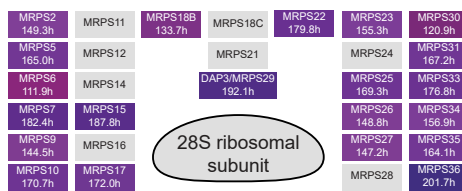

## 26S proteasome

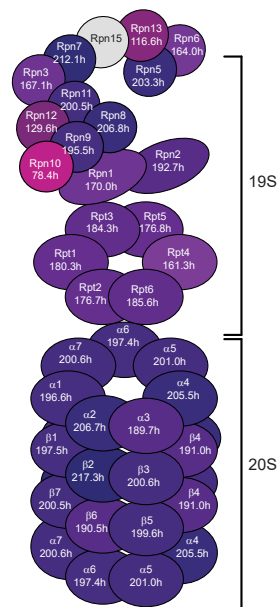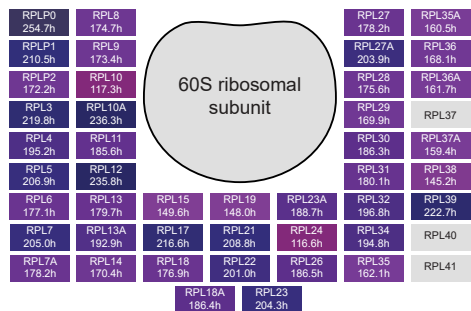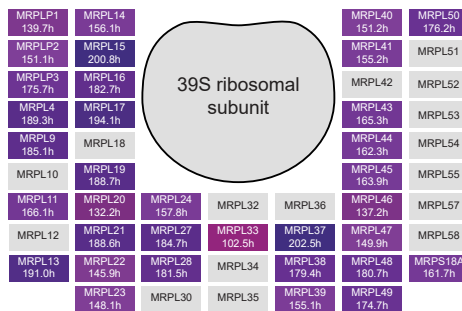

Color legend (half-life in hours)

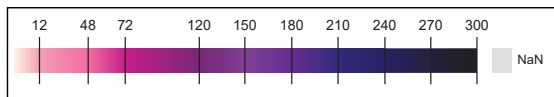

B)

## Ribosome

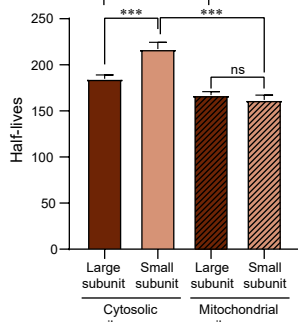

## Proteasome

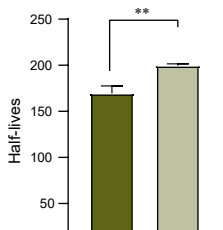

C)

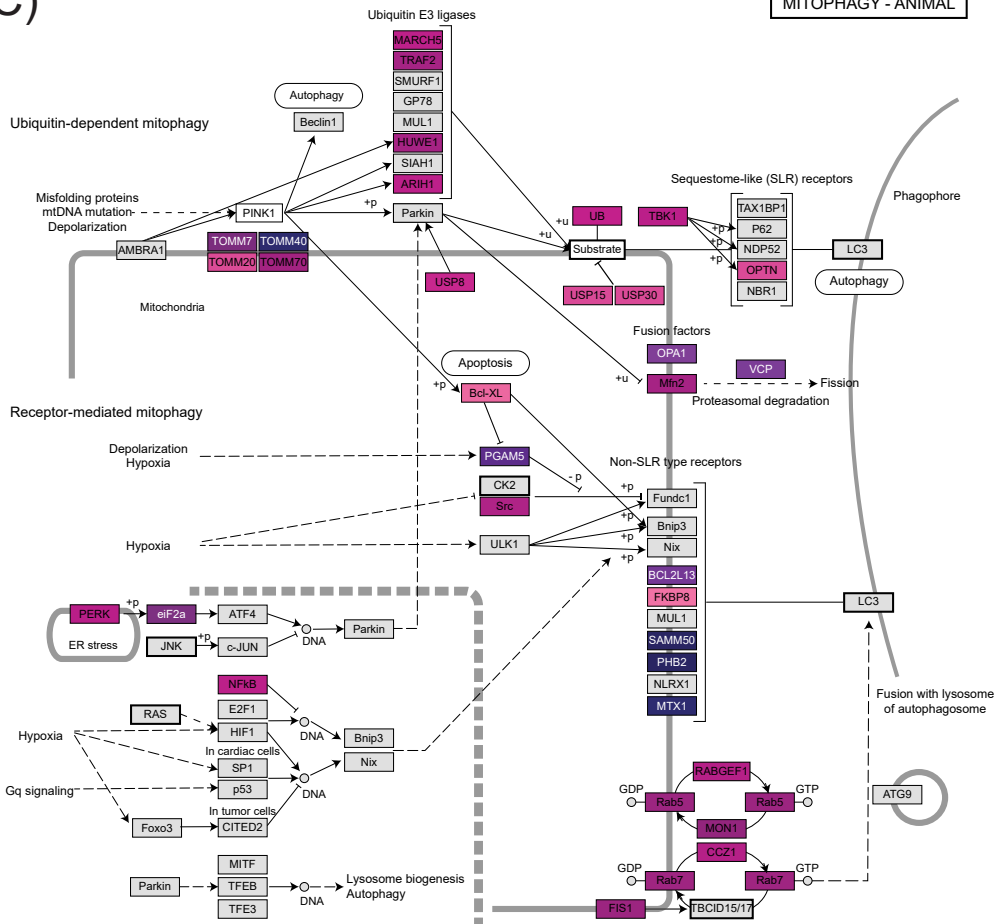

Supplement: mmc4.pdf [file mmc4.pdf]
