# Supplementary material for: Proteome Dynamics in iPSC-Derived Human Dopaminergic Neurons
Source: PubMed Central journal article supplement (PMC11474371; doi:10.1016/j.mcpro.2024.100838), 2024-09-07

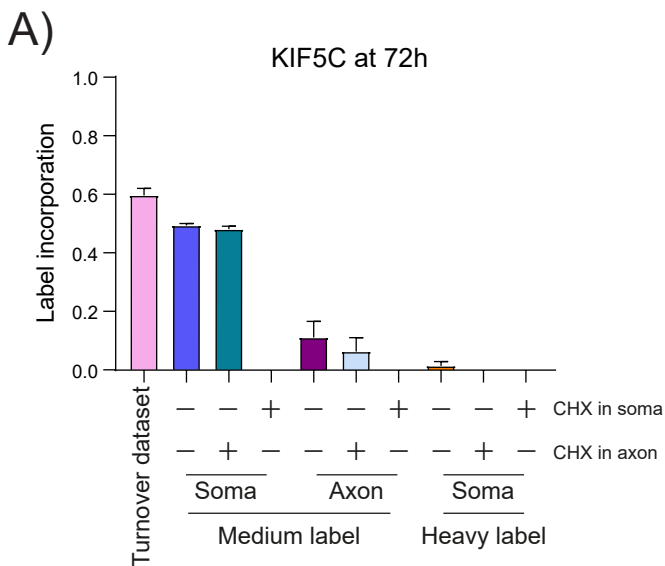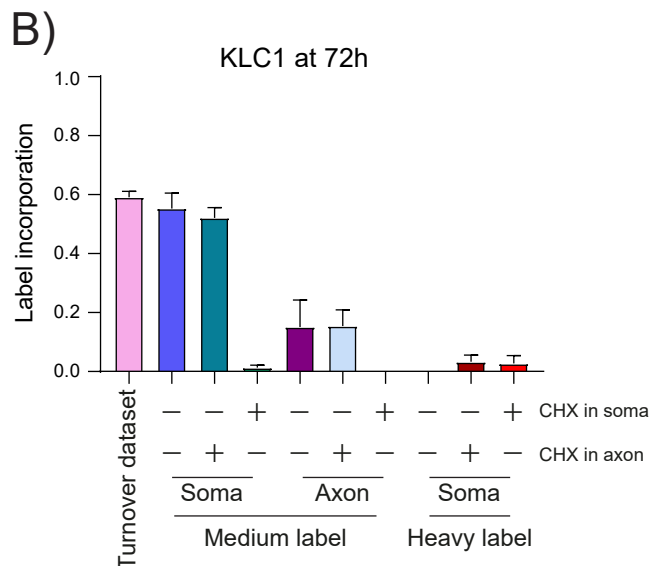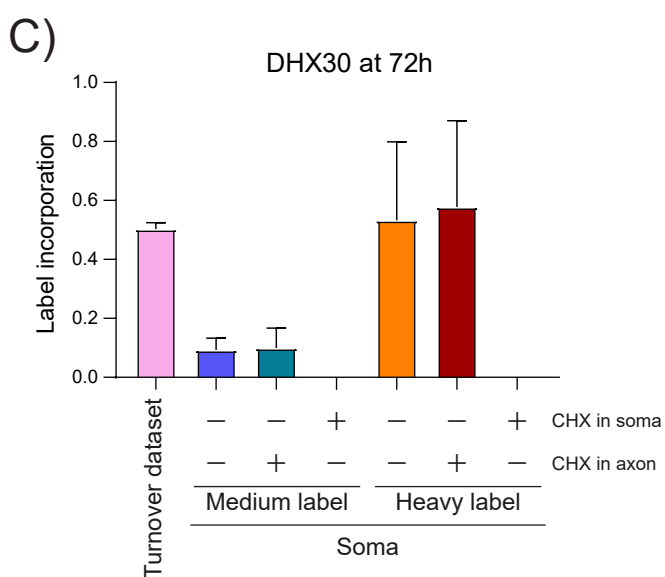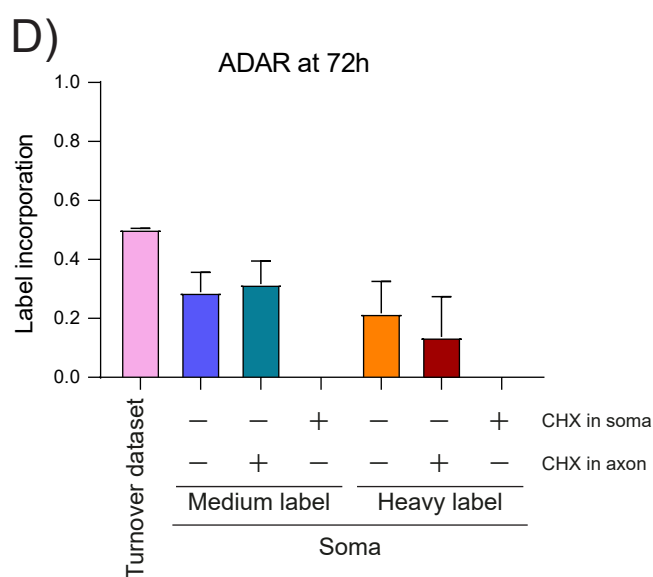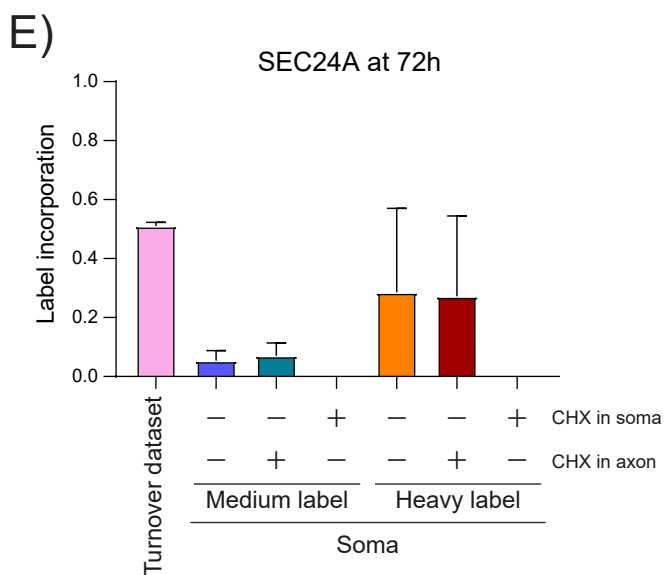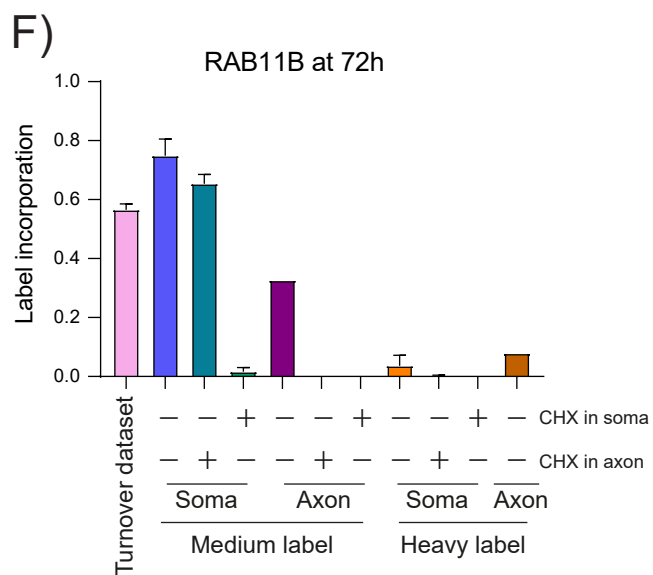

Supplement: mmc7.pdf [file mmc7.pdf]
